# Supplementary material for: Continuation of Atypical Antipsychotic Medication During Early Pregnancy and the Risk of Gestational Diabetes
Source: Atypon-hosted journal article supplement (doi:10.1176/appi.ajp.2018.17040393), 2018-05-07
Supplement: appi.ajp.2018.17040393.ds001.pdf [file appi.ajp.2018.17040393.ds001.pdf]

## **Continuation of Atypical Antipsychotic Medication during Early Pregnancy and the Risk of Gestational Diabetes**

### **Electronic supplement materials**

Table S1. All patient characteristics comparing continuers to discontinuers of each atypical antipsychotic medication, unadjusted

Table S2. All patient characteristics comparing continuers to discontinuers of each atypical antipsychotic medication, weighted by propensity score

Table S3. Results from additional analyses based on the risk-stratified groups

Table S4. The difference in obesity prevalence between continuers and discontinuers of olanzapine or quetiapine used in the sensitivity analysis

Figure S1. Study design, exposure definition, and outcome definition

Figure S2. Flow chart illustrating the cohort creation process for each antipsychotic exposure group

**Table S1. All patient characteristics comparing continuers to discontinuers of each atypical antipsychotic medication, unadjusted**

|                                          | Aripiprazole            |                   |                    | Ziprasidone |                   |                   | Quetiapine |                    |                    | Risperidone |                   |                    | Olanzapine |                   |                    |       |
|------------------------------------------|-------------------------|-------------------|--------------------|-------------|-------------------|-------------------|------------|--------------------|--------------------|-------------|-------------------|--------------------|------------|-------------------|--------------------|-------|
|                                          | Group<br>N <sup>a</sup> | Cont.<br>419<br>% | Disc.<br>1505<br>% | SDiff       | Cont.<br>167<br>% | Disc.<br>506<br>% | SDiff      | Cont.<br>1543<br>% | Disc.<br>2990<br>% | SDiff       | Cont.<br>359<br>% | Disc.<br>1465<br>% | SDiff      | Cont.<br>384<br>% | Disc.<br>1041<br>% | SDiff |
| <b>Demographics</b>                      |                         |                   |                    |             |                   |                   |            |                    |                    |             |                   |                    |            |                   |                    |       |
| Age <20                                  |                         | 30.1              | 36.0               | 0.13        | 16.2              | 25.5              | 0.23       | 15.6               | 26.0               | 0.26        | 29.2              | 32.4               | 0.07       | 10.2              | 18.1               | 0.23  |
| Age 20 to <30                            |                         | 43.7              | 48.6               | 0.10        | 61.7              | 56.3              | 0.11       | 50.7               | 54.7               | 0.08        | 40.9              | 51.8               | 0.22       | 45.6              | 60.1               | 0.30  |
| Age 30 to <40                            |                         | 22.7              | 14.4               | 0.22        | 18.6              | 17.2              | 0.04       | 30.9               | 18.0               | 0.31        | 27.6              | 14.8               | 0.32       | 40.1              | 20.0               | 0.45  |
| Age > 40                                 |                         | 3.6               | 1.0                | 0.17        | 3.6               | 1.0               | 0.18       | 2.8                | 1.3                | 0.10        | 2.2               | 1.0                | 0.10       | 4.2               | 1.8                | 0.14  |
| White                                    |                         | 66.3              | 65.4               | 0.02        | 69.5              | 67.8              | 0.04       | 72.5               | 68.3               | 0.09        | 49.0              | 54.5               | 0.11       | 50.8              | 61.2               | 0.21  |
| Black                                    |                         | 19.6              | 18.6               | 0.03        | 19.2              | 21.3              | 0.05       | 15.4               | 17.2               | 0.05        | 30.4              | 30.2               | 0.00       | 24.2              | 22.8               | 0.03  |
| Other race                               |                         | 14.1              | 15.9               | 0.05        | 11.4              | 10.9              | 0.02       | 12.1               | 14.5               | 0.07        | 20.6              | 15.3               | 0.14       | 25.0              | 16.0               | 0.22  |
| Eligibility <sup>b</sup> at baseline     |                         | 15.3              | 18.2               | 0.08        | 7.2               | 16.2              | 0.28       | 9.6                | 12.0               | 0.08        | 9.2               | 13.4               | 0.13       | 3.6               | 8.9                | 0.22  |
| Eligibility <sup>b</sup> before delivery |                         | 18.6              | 22.5               | 0.10        | 15.0              | 19.0              | 0.11       | 15.9               | 19.4               | 0.09        | 14.2              | 18.0               | 0.10       | 8.6               | 15.3               | 0.21  |
| <b>Mental health diagnosis</b>           |                         |                   |                    |             |                   |                   |            |                    |                    |             |                   |                    |            |                   |                    |       |
| ADHD                                     |                         | 9.3               | 11.8               | 0.08        | 10.2              | 8.3               | 0.07       | 8.4                | 7.9                | 0.02        | 15.6              | 9.8                | 0.18       | 4.4               | 4.8                | 0.02  |
| Bipolar disorder                         |                         | 44.6              | 38.4               | 0.13        | 45.5              | 37.7              | 0.16       | 36.0               | 27.5               | 0.18        | 25.1              | 23.8               | 0.03       | 32.0              | 28.9               | 0.07  |
| Schizophrenia/Other psychoses            |                         | 10.0              | 7.2                | 0.10        | 19.2              | 9.9               | 0.27       | 7.4                | 5.1                | 0.10        | 18.7              | 10.7               | 0.23       | 24.7              | 9.8                | 0.40  |
| Other psychiatric disorders              |                         | 11.5              | 7.9                | 0.12        | 8.4               | 9.3               | 0.03       | 8.7                | 10.2               | 0.05        | 7.5               | 9.4                | 0.07       | 6.8               | 8.5                | 0.07  |
| Depression                               |                         | 39.1              | 38.2               | 0.02        | 39.5              | 37.7              | 0.04       | 42.9               | 43.2               | 0.01        | 44.8              | 44.5               | 0.01       | 38.0              | 39.7               | 0.03  |
| Anxiety disorder                         |                         | 24.8              | 20.8               | 0.10        | 21.6              | 22.5              | 0.02       | 28.7               | 22.9               | 0.13        | 20.1              | 20.3               | 0.01       | 20.6              | 20.9               | 0.01  |
| <b>Comorbidity</b>                       |                         |                   |                    |             |                   |                   |            |                    |                    |             |                   |                    |            |                   |                    |       |
| Prior GDM <sup>b</sup>                   |                         | 4.8               | 4.3                | 0.03        | 2.4               | 7.1               | 0.22       | 4.9                | 4.3                | 0.03        | 3.1               | 2.6                | 0.03       | 2.9               | 3.2                | 0.02  |
| Any pain disorder                        |                         | 40.3              | 36.3               | 0.08        | 42.5              | 42.3              | 0.01       | 45.4               | 38.6               | 0.14        | 31.5              | 32.7               | 0.03       | 32.3              | 38.6               | 0.13  |
| Hypertension                             |                         | 4.8               | 2.8                | 0.10        | 4.8               | 3.0               | 0.10       | 5.2                | 3.4                | 0.09        | 3.6               | 3.4                | 0.01       | 3.9               | 3.7                | 0.01  |
| Obesity                                  |                         | 5.3               | 3.7                | 0.07        | 4.8               | 3.4               | 0.07       | 2.3                | 2.6                | 0.02        | 2.2               | 2.5                | 0.02       | 2.3               | 1.4                | 0.07  |
| Dyslipidemia                             |                         | 3.6               | 1.7                | 0.12        | 4.8               | 1.4               | 0.20       | 2.1                | 1.5                | 0.05        | 0.8               | 1.2                | 0.04       | 3.4               | 1.7                | 0.11  |
| <b>Other medication use</b>              |                         |                   |                    |             |                   |                   |            |                    |                    |             |                   |                    |            |                   |                    |       |
| Anticonvulsants                          |                         | 33.2              | 24.4               | 0.20        | 33.5              | 28.3              | 0.11       | 36.4               | 27.5               | 0.19        | 31.5              | 23.9               | 0.17       | 25.3              | 18.4               | 0.17  |
| Antidepressants                          |                         | 71.8              | 63.2               | 0.19        | 73.7              | 65.8              | 0.17       | 75.6               | 68.0               | 0.17        | 71.9              | 68.4               | 0.08       | 70.1              | 65.6               | 0.10  |
| Anxiolytics                              |                         | 3.3               | 3.5                | 0.01        | 3.6               | 4.7               | 0.06       | 5.1                | 3.6                | 0.07        | 2.8               | 2.8                | 0.00       | 2.1               | 3.7                | 0.10  |
| Benzodiazepines                          |                         | 34.1              | 20.9               | 0.30        | 41.9              | 24.3              | 0.38       | 39.4               | 23.2               | 0.36        | 24.5              | 17.7               | 0.17       | 29.7              | 22.2               | 0.17  |
| Mood stabilizers <sup>c</sup>            |                         | 30.1              | 23.5               | 0.15        | 31.7              | 27.5              | 0.09       | 31.8               | 26.0               | 0.13        | 30.1              | 22.7               | 0.17       | 21.6              | 18.1               | 0.09  |
| Opioids                                  |                         | 36.0              | 34.3               | 0.04        | 40.1              | 39.1              | 0.02       | 46.7               | 37.9               | 0.18        | 28.4              | 28.9               | 0.01       | 32.6              | 34.4               | 0.04  |
| Other hypnotics                          |                         | 24.1              | 15.3               | 0.22        | 28.1              | 17.4              | 0.26       | 20.6               | 16.3               | 0.11        | 13.6              | 13.9               | 0.01       | 17.7              | 14.5               | 0.09  |
| Stimulants                               |                         | 15.5              | 12.2               | 0.10        | 15.6              | 7.3               | 0.26       | 11.5               | 8.8                | 0.09        | 18.9              | 9.6                | 0.27       | 4.2               | 3.7                | 0.03  |
| Antihypertensives                        |                         | 10.0              | 6.1                | 0.14        | 10.2              | 3.8               | 0.25       | 10.7               | 6.6                | 0.15        | 8.9               | 7.2                | 0.06       | 5.5               | 6.3                | 0.04  |

**Health service utilization in 90 days before LMP**

|                       |   |   |      |   |   |      |   |   |      |   |   |      |   |   |      |
|-----------------------|---|---|------|---|---|------|---|---|------|---|---|------|---|---|------|
| Median N generic drug | 8 | 7 | 0.23 | 9 | 8 | 0.23 | 9 | 8 | 0.25 | 7 | 7 | 0.11 | 7 | 7 | 0.01 |
| Median N ED visits    | 1 | 1 | 0.09 | 1 | 1 | 0.06 | 1 | 1 | 0.00 | 0 | 1 | 0.19 | 0 | 1 | 0.14 |

**Duration of antipsychotic use during 90 days before LMP**

|                            |      |      |      |      |      |      |      |      |      |      |      |      |      |      |      |
|----------------------------|------|------|------|------|------|------|------|------|------|------|------|------|------|------|------|
| Exposed ≤30 days           | 20.0 | 52.6 | 0.72 | 15.6 | 56.7 | 0.95 | 19.2 | 50.1 | 0.68 | 26.7 | 57.0 | 0.64 | 20.1 | 59.2 | 0.87 |
| Exposed >30 days, ≤60 days | 30.5 | 29.2 | 0.03 | 21.6 | 26.5 | 0.12 | 20.2 | 29.9 | 0.23 | 27.9 | 29.9 | 0.05 | 25.3 | 27.2 | 0.04 |
| Exposed >60 days           | 49.4 | 18.1 | 0.70 | 62.9 | 16.8 | 1.07 | 60.5 | 20.0 | 0.91 | 45.4 | 13.1 | 0.76 | 54.7 | 13.6 | 0.96 |

<sup>a</sup> Number of subject in each group before trimming and stratification

<sup>b</sup> The presence of a diagnosis of GDM in a previous pregnancy was assessed based on all available data before the start of the index pregnancy

<sup>c</sup> Mood stabilizers: Lithium, Carbamazepine, divalproex, lamotrigine, oxcarbazepine, topiramate, valproic acid, valproate sodium

Cont: Continuers; Disc: Discontinuers; SDiff: standardized difference; ADHD: attention-deficit hyperactivity disorder; GDM: gestational diabetes; ED: emergency department; LMP: last menstrual period  
Variable formats as used in the propensity score model

**Table S2. All patient characteristics comparing continuers to discontinuers of each atypical antipsychotic medication, weighted by propensity score**

|                                       | Aripiprazole            |              |               | Ziprasidone  |              |             | Quetiapine    |               |       | Risperidone  |               |       | Olanzapine   |              |             |             |
|---------------------------------------|-------------------------|--------------|---------------|--------------|--------------|-------------|---------------|---------------|-------|--------------|---------------|-------|--------------|--------------|-------------|-------------|
|                                       | Group<br>N <sup>a</sup> | Cont.<br>416 | Disc.<br>1421 | Cont.<br>140 | Disc.<br>431 | SDiff       | Cont.<br>1542 | Disc.<br>2951 | SDiff | Cont.<br>343 | Disc.<br>1449 | SDiff | Cont.<br>375 | Disc.<br>978 | SDiff       |             |
|                                       |                         | %            | %             | %            | %            |             | %             | %             |       | %            | %             |       | %            | %            |             |             |
| <b>Demographics</b>                   |                         |              |               |              |              |             |               |               |       |              |               |       |              |              |             |             |
| Age <20                               |                         | 30.3         | 31.7          | 0.03         | 18.6         | 18.3        | 0.01          | 15.6          | 15.4  | 0.00         | 29.2          | 27.9  | 0.03         | 10.4         | 11.5        | 0.04        |
| Age 20 to <30                         |                         | 44.0         | 44.3          | 0.01         | 58.6         | 61.7        | 0.06          | 50.8          | 51.5  | 0.02         | 42.0          | 40.8  | 0.02         | <b>45.6</b>  | <b>50.9</b> | <b>0.11</b> |
| Age 30 to <40                         |                         | 22.4         | 21.0          | 0.03         | 20.7         | 18.8        | 0.05          | 30.9          | 30.7  | 0.00         | 26.8          | 27.8  | 0.02         | 39.7         | 35.2        | 0.10        |
| Age > 40                              |                         | 3.4          | 2.9           | 0.03         | 2.1          | 1.2         | 0.07          | 2.8           | 2.4   | 0.03         | 2.0           | 3.5   | 0.09         | 4.3          | 2.5         | 0.10        |
| White                                 |                         | 66.6         | 68.6          | 0.04         | 67.9         | 68.2        | 0.01          | 72.4          | 72.5  | 0.00         | 49.3          | 50.3  | 0.02         | 51.2         | 52.6        | 0.03        |
| Black                                 |                         | 19.7         | 19.2          | 0.01         | 20.7         | 21.0        | 0.01          | 15.4          | 16.0  | 0.01         | 30.3          | 30.9  | 0.01         | 24.5         | 23.4        | 0.03        |
| Other race                            |                         | 13.7         | 12.3          | 0.04         | 11.4         | 10.8        | 0.02          | 12.1          | 11.5  | 0.02         | 20.4          | 18.8  | 0.04         | 24.3         | 24.1        | 0.01        |
| Eligibility (poverty) at baseline     |                         | 15.4         | 16.5          | 0.03         | 8.6          | 7.5         | 0.04          | 9.6           | 10.2  | 0.02         | 9.6           | 10.4  | 0.03         | 3.7          | 4.2         | 0.03        |
| Eligibility (poverty) before delivery |                         | 18.8         | 19.9          | 0.03         | 15.7         | 17.9        | 0.06          | 16.0          | 15.4  | 0.01         | 14.3          | 13.4  | 0.03         | 8.8          | 8.4         | 0.02        |
| <b>Mental health diagnosis</b>        |                         |              |               |              |              |             |               |               |       |              |               |       |              |              |             |             |
| ADHD                                  |                         | 9.4          | 9.2           | 0.01         | 10.7         | 10.0        | 0.02          | 8.3           | 8.3   | 0.00         | 14.9          | 15.0  | 0.00         | 4.5          | 5.3         | 0.03        |
| Bipolar disorder                      |                         | 44.5         | 45.0          | 0.01         | 44.3         | 45.2        | 0.02          | 35.9          | 35.3  | 0.01         | 25.1          | 25.6  | 0.01         | <b>31.7</b>  | <b>41.9</b> | <b>0.21</b> |
| Schizophrenia/Other psychoses         |                         | 10.1         | 10.7          | 0.02         | 17.1         | 17.8        | 0.02          | 7.4           | 8.2   | 0.03         | 17.8          | 18.7  | 0.02         | 22.9         | 24.1        | 0.03        |
| Other psychiatric disorders           |                         | 11.3         | 12.7          | 0.05         | <b>7.9</b>   | <b>10.9</b> | <b>0.11</b>   | 8.7           | 9.6   | 0.03         | 7.3           | 7.3   | 0.00         | 6.9          | 7.0         | 0.00        |
| Depression                            |                         | 39.2         | 38.0          | 0.02         | 41.4         | 39.8        | 0.03          | 42.9          | 43.7  | 0.02         | 44.3          | 45.6  | 0.03         | 38.7         | 39.3        | 0.01        |
| Anxiety disorder                      |                         | 24.8         | 25.9          | 0.03         | 22.1         | 22.6        | 0.01          | 28.7          | 29.5  | 0.02         | 19.8          | 19.3  | 0.01         | 20.8         | 24.1        | 0.08        |
| <b>Comorbidity</b>                    |                         |              |               |              |              |             |               |               |       |              |               |       |              |              |             |             |
| Prior GDM <sup>b</sup>                |                         | 4.8          | 4.7           | 0.00         | 2.1          | 1.6         | 0.04          | 4.9           | 5.2   | 0.01         | 3.2           | 2.8   | 0.02         | 2.9          | 1.5         | 0.09        |
| Any pain disorder                     |                         | 39.9         | 41.1          | 0.03         | 42.1         | 43.1        | 0.02          | 45.4          | 45.9  | 0.01         | 30.9          | 32.9  | 0.04         | 32.0         | 32.4        | 0.01        |
| Hypertension                          |                         | 4.3          | 4.0           | 0.02         | 3.6          | 5.4         | 0.09          | 5.2           | 4.8   | 0.02         | 3.8           | 4.3   | 0.03         | 3.7          | 2.6         | 0.06        |
| Obesity                               |                         | 5.3          | 4.6           | 0.03         | 3.6          | 4.5         | 0.05          | 2.3           | 2.2   | 0.01         | 2.3           | 1.7   | 0.05         | <b>2.4</b>   | <b>0.7</b>  | <b>0.14</b> |
| Dyslipidemia                          |                         | 3.4          | 2.4           | 0.06         | 2.1          | 1.8         | 0.02          | 2.1           | 2.7   | 0.04         | 0.9           | 1.1   | 0.02         | 2.9          | 1.6         | 0.09        |
| <b>Other medication use</b>           |                         |              |               |              |              |             |               |               |       |              |               |       |              |              |             |             |
| Anticonvulsants                       |                         | 32.7         | 31.6          | 0.02         | <b>32.1</b>  | <b>37.1</b> | <b>0.11</b>   | 36.4          | 36.8  | 0.01         | 29.4          | 30.4  | 0.02         | <b>25.1</b>  | <b>30.1</b> | <b>0.11</b> |
| Antidepressants                       |                         | 71.6         | 71.8          | 0.00         | 73.6         | 72.4        | 0.03          | 75.6          | 75.5  | 0.00         | 72.6          | 72.2  | 0.01         | 70.7         | 71.2        | 0.01        |
| Anxiolytics                           |                         | 3.4          | 3.0           | 0.02         | <b>4.3</b>   | <b>8.8</b>  | <b>0.18</b>   | 5.0           | 5.3   | 0.02         | 2.6           | 2.7   | 0.00         | 2.1          | 2.1         | 0.01        |
| Benzodiazepines                       |                         | 33.7         | 35.2          | 0.03         | 39.3         | 40.5        | 0.02          | 39.4          | 38.9  | 0.01         | 23.6          | 24.7  | 0.03         | 29.1         | 31.3        | 0.05        |
| Mood stabilizers <sup>c</sup>         |                         | 29.6         | 28.9          | 0.01         | 31.4         | 35.4        | 0.09          | 31.8          | 31.3  | 0.01         | 28.6          | 32.1  | 0.08         | <b>21.3</b>  | <b>26.5</b> | <b>0.12</b> |
| Opioids                               |                         | 35.8         | 38.1          | 0.05         | 40.7         | 40.3        | 0.01          | 46.7          | 47.1  | 0.01         | 27.4          | 27.7  | 0.01         | 32.8         | 34.1        | 0.03        |
| Other hypnotics                       |                         | 23.8         | 25.2          | 0.03         | 27.9         | 27.3        | 0.01          | 20.6          | 21.0  | 0.01         | 14.0          | 13.7  | 0.01         | 17.6         | 19.7        | 0.06        |
| Stimulants                            |                         | 15.4         | 14.9          | 0.01         | 14.3         | 13.3        | 0.03          | 11.4          | 11.2  | 0.01         | 17.8          | 17.5  | 0.01         | 4.3          | 3.9         | 0.02        |

|                                                                |      |      |      |            |             |             |      |      |      |      |      |      |      |      |      |
|----------------------------------------------------------------|------|------|------|------------|-------------|-------------|------|------|------|------|------|------|------|------|------|
| Antihypertensives                                              | 9.6  | 12.2 | 0.08 | <b>7.1</b> | <b>11.6</b> | <b>0.15</b> | 10.7 | 11.5 | 0.02 | 9.0  | 11.0 | 0.07 | 5.3  | 5.6  | 0.01 |
| <b>Health service utilization in 90 days before LMP</b>        |      |      |      |            |             |             |      |      |      |      |      |      |      |      |      |
| Median N generic drug                                          | 8    | 7    | 0.03 | <b>7</b>   | <b>8</b>    | <b>0.12</b> | 9    | 9    | 0.01 | 7    | 8    | 0.01 | 7    | 7    | 0.09 |
| Median N ED visits                                             | 1    | 1    | 0.02 | 1          | 1           | 0.07        | 1    | 1    | 0.01 | 0    | 0    | 0.07 | 0    | 1    | 0.05 |
| <b>Duration of antipsychotic use during 90 days before LMP</b> |      |      |      |            |             |             |      |      |      |      |      |      |      |      |      |
| Exposed ≤30 days                                               | 20.2 | 20.0 | 0.01 | 18.6       | 17.3        | 0.03        | 19.3 | 19.3 | 0.00 | 27.7 | 28.0 | 0.01 | 20.5 | 21.0 | 0.01 |
| Exposed >30 days, ≤60 days                                     | 30.8 | 31.2 | 0.01 | 23.6       | 25.8        | 0.05        | 20.2 | 20.4 | 0.01 | 28.9 | 29.9 | 0.02 | 25.9 | 23.6 | 0.05 |
| Exposed >60 days                                               | 49.0 | 48.8 | 0.00 | 57.9       | 56.9        | 0.02        | 60.5 | 60.2 | 0.01 | 43.4 | 42.1 | 0.03 | 53.6 | 55.4 | 0.04 |

<sup>a</sup> Number of subject in each group after trimming and stratification

<sup>b</sup> The presence of a diagnosis of GDM in a previous pregnancy was assessed based on all available data before the start of the index pregnancy

Bolded cells: Absolute Standardized difference > 0.1 after propensity score weighting.

<sup>c</sup> Mood stabilizers: Lithium, Carbamazepine, divalproex, lamotrigine, oxcarbazepine, topiramate, valproic acid, valproate sodium

Cont: Continuers; Disc: Discontinuers; SDiff: standardized difference; ADHD: attention-deficit hyperactivity disorder; GDM: gestational diabetes; ED: emergency department; LMP: last menstrual period

**Table S3. Results from additional analyses based on the risk-stratified groups, comparing continuers to discontinuers with respect to the risk of gestational diabetes**

| Groups/ Analysis           | N            | Case (n) | Risk | Unadjusted |             | Adjusted     |             |              |
|----------------------------|--------------|----------|------|------------|-------------|--------------|-------------|--------------|
|                            |              |          |      | RR         | 95% CI      | RR           | 95% CI      |              |
| <b>Low risk group</b>      |              |          |      |            |             |              |             |              |
| Restricted                 | Continuer    | 440      | 19   | 4.3%       | <b>0.83</b> | (0.51, 1.37) | <b>0.68</b> | (0.41, 1.11) |
|                            | Discontinuer | 1333     | 69   | 5.2%       |             |              |             |              |
| 6-month baseline           | Continuer    | 408      | 19   | 4.7%       | <b>1.03</b> | (0.62, 1.71) | <b>0.72</b> | (0.44, 1.19) |
|                            | Discontinuer | 1261     | 57   | 4.5%       |             |              |             |              |
| 12-month baseline          | Continuer    | 306      | 15   | 4.9%       | <b>1.14</b> | (0.64, 2.02) | <b>1.03</b> | (0.57, 1.85) |
|                            | Discontinuer | 973      | 42   | 4.3%       |             |              |             |              |
| hdPS adjusted <sup>a</sup> |              |          |      |            |             |              | <b>0.80</b> | (0.52, 1.24) |
| <b>Medium risk group</b>   |              |          |      |            |             |              |             |              |
| Restricted                 | Continuer    | 1304     | 91   | 7.0%       | <b>1.67</b> | (1.28, 2.18) | <b>1.25</b> | (0.97, 1.61) |
|                            | Discontinuer | 2778     | 116  | 4.2%       |             |              |             |              |
| 6-month baseline           | Continuer    | 1291     | 93   | 7.2%       | <b>1.76</b> | (1.35, 2.27) | <b>1.46</b> | (1.14, 1.87) |
|                            | Discontinuer | 3119     | 128  | 4.1%       |             |              |             |              |
| 12-month baseline          | Continuer    | 993      | 61   | 6.1%       | <b>1.44</b> | (1.06, 1.96) | <b>1.21</b> | (0.90, 1.64) |
|                            | Discontinuer | 2388     | 102  | 4.3%       |             |              |             |              |
| hdPS adjusted              |              |          |      |            |             |              | <b>1.27</b> | (1.04, 1.56) |
| <b>High risk group</b>     |              |          |      |            |             |              |             |              |
| Restricted                 | Continuer    | 274      | 36   | 13.1%      | <b>2.84</b> | (1.78, 4.53) | <b>1.84</b> | (1.14, 2.96) |
|                            | Discontinuer | 626      | 29   | 4.6%       |             |              |             |              |
| 6-month baseline           | Continuer    | 291      | 34   | 11.7%      | <b>2.47</b> | (1.58, 3.87) | <b>1.72</b> | (1.09, 2.71) |
|                            | Discontinuer | 762      | 36   | 4.7%       |             |              |             |              |
| 12-month baseline          | Continuer    | 226      | 26   | 11.5%      | <b>2.86</b> | (1.68, 4.88) | <b>3.39</b> | (1.83, 6.27) |
|                            | Discontinuer | 597      | 24   | 4.0%       |             |              |             |              |
| hdPS adjusted              |              |          |      |            |             |              | <b>1.33</b> | (0.93, 1.91) |

<sup>a</sup> hdPS adjusted: stratification adjustment using 50 additional confounder proxy variables in propensity score estimation

RR: relative risks; CI: confidence interval; hdPS: high-dimensional propensity score

**Table S4. The difference in obesity prevalence between continuers and discontinuers of olanzapine or quetiapine used in the sensitivity analysis**

| <b>Olanzapine</b>    |                       |                       |                      |                         | <b>ALB=1.13</b> | <b>ARR=1.61</b>       | <b>AUB=2.29</b>       |
|----------------------|-----------------------|-----------------------|----------------------|-------------------------|-----------------|-----------------------|-----------------------|
| <b>P<sub>E</sub></b> | <b>P<sub>C1</sub></b> | <b>P<sub>C0</sub></b> | <b>P<sub>C</sub></b> | <b>P<sub>diff</sub></b> |                 | <b>RR<sub>2</sub></b> | <b>RR<sub>3</sub></b> |
| 0.27                 | 0.45                  | 0.68                  | 0.62                 | -0.23                   | 1.47            | 2.09                  | 2.97                  |
| 0.27                 | 0.5                   | 0.66                  | 0.62                 | -0.16                   | 1.35            | 1.93                  | 2.74                  |
| 0.27                 | 0.55                  | 0.65                  | 0.62                 | -0.10                   | 1.25            | 1.78                  | 2.54                  |
| 0.27                 | 0.6                   | 0.63                  | 0.62                 | -0.03                   | 1.16            | 1.66                  | 2.36                  |
| 0.27                 | 0.65                  | 0.61                  | 0.62                 | 0.04                    | 1.08            | 1.54                  | 2.19                  |
| 0.27                 | 0.7                   | 0.59                  | 0.62                 | 0.11                    | 1.01            | 1.44                  | 2.05                  |
| 0.27                 | 0.75                  | 0.57                  | 0.62                 | 0.18                    | 0.94            | 1.35                  | 1.91                  |
| 0.27                 | 0.8                   | 0.55                  | 0.62                 | 0.25                    | 0.88            | 1.26                  | 1.79                  |

  

| <b>Quetiapine</b>    |                       |                       |                      |                         | <b>ALB=1.01</b>       | <b>ARR=1.28</b>       | <b>AUB=1.62</b>       |
|----------------------|-----------------------|-----------------------|----------------------|-------------------------|-----------------------|-----------------------|-----------------------|
| <b>P<sub>E</sub></b> | <b>P<sub>C1</sub></b> | <b>P<sub>C0</sub></b> | <b>P<sub>C</sub></b> | <b>P<sub>diff</sub></b> | <b>RR<sub>1</sub></b> | <b>RR<sub>2</sub></b> | <b>RR<sub>3</sub></b> |
| 0.34                 | 0.45                  | 0.71                  | 0.62                 | -0.26                   | 1.34                  | 1.70                  | 2.15                  |
| 0.34                 | 0.5                   | 0.68                  | 0.62                 | -0.18                   | 1.23                  | 1.56                  | 1.97                  |
| 0.34                 | 0.55                  | 0.66                  | 0.62                 | -0.11                   | 1.13                  | 1.43                  | 1.81                  |
| 0.34                 | 0.6                   | 0.63                  | 0.62                 | -0.03                   | 1.04                  | 1.32                  | 1.67                  |
| 0.34                 | 0.65                  | 0.60                  | 0.62                 | 0.05                    | 0.96                  | 1.22                  | 1.55                  |
| 0.34                 | 0.7                   | 0.58                  | 0.62                 | 0.12                    | 0.89                  | 1.13                  | 1.43                  |
| 0.34                 | 0.75                  | 0.55                  | 0.62                 | 0.20                    | 0.83                  | 1.05                  | 1.33                  |
| 0.34                 | 0.8                   | 0.53                  | 0.62                 | 0.27                    | 0.77                  | 0.97                  | 1.23                  |

RR= relative risk adjusted for obesity, ARR = apparent RR before adjusting for obesity, ALB = apparent lower bound, AUB = apparent upper bound, P<sub>E</sub> = prevalence of continuers, P<sub>C1</sub> = obesity prevalence among the exposed, P<sub>C0</sub> = obesity prevalence among the unexposed, P<sub>C</sub> = obesity prevalence in the entire population (fixed at 0.62), and P<sub>diff</sub> = P<sub>C1</sub> - P<sub>C0</sub>.

The strength of association between obesity and the risk of gestational diabetes (RR<sub>CD</sub>) is assumed to be 4.

Each boxed row represents the combination of parameters that corrects the ARR close to 1.00.

Figure S1. Study design, exposure definition, and outcome definition

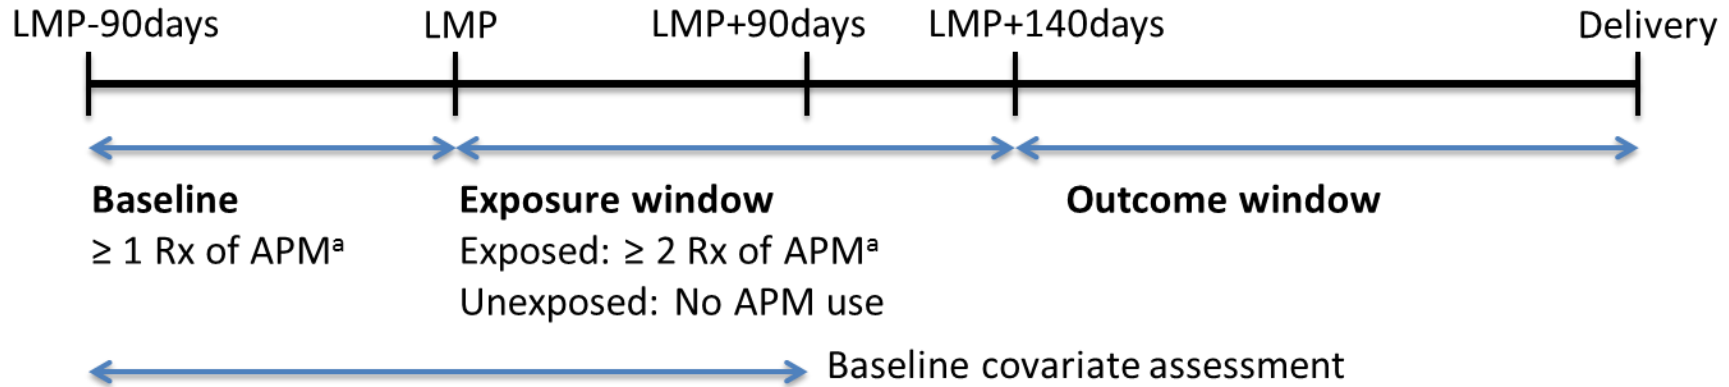

|                                           | Gestational diabetes (case definition)                                                                                                                                                                                                                                                                                                                                                                                                                | Pre-gestational diabetes (excluded)                                                                                                                                                                                                                                                                                                             |
|-------------------------------------------|-------------------------------------------------------------------------------------------------------------------------------------------------------------------------------------------------------------------------------------------------------------------------------------------------------------------------------------------------------------------------------------------------------------------------------------------------------|-------------------------------------------------------------------------------------------------------------------------------------------------------------------------------------------------------------------------------------------------------------------------------------------------------------------------------------------------|
| <b>Based on the algorithm<sup>b</sup></b> | <p><math>\geq 2</math> diagnosis codes (250.x, 648.0x, 648.8x) on different dates from LMP+141 to delivery <i>and</i> meet the following conditions:</p> <p>No diabetes diagnosis, GTT, or treatment between LMP and LMP+140 and <i>either</i></p> <ol style="list-style-type: none"> <li>GTT between LMP+141 and delivery <i>or</i></li> <li>No GTT at any time but have at least one GDM diagnosis (648.8x) between LMP+141 and delivery</li> </ol> | <p><math>\geq 2</math> diagnosis codes (250.x, 648.0x, 648.8x) on different dates from LMP to delivery <i>and</i></p> <p>Those who do not meet the case definition of gestational diabetes (i.e. received diagnosis, GTT, or treatment for diabetes between LMP and LMP+140 or only have diagnoses for pre-existing diabetes without a GTT)</p> |
| <b>Additional exclusion</b>               |                                                                                                                                                                                                                                                                                                                                                                                                                                                       | 1 diagnosis code (250.x, 648.0x, 648.8x) or diabetes treatment without a diagnosis code using the baseline covariate definitions                                                                                                                                                                                                                |

LMP: Last menstrual period; Rx: prescription; APM: Antipsychotic; GTT: glucose tolerance test

<sup>a</sup> Restricted to use of a single antipsychotic agent during baseline and exposure window

<sup>b</sup> In the original algorithm by Andrade et al, exclusion was based on LMP+90 days rather than LMP+140 days. It was modified to meet our exposure definition and also to make the case definition more specific



Following algorithm by Andrade et al., We excluded women with two or more diagnoses of any diabetes (gestational or pre-gestational, ICD-9 code 250.x, 648.0x, 648.8x) who received the first diagnosis, glucose tolerance test (GTT), or diabetes treatment before or on day 140 of pregnancy (i.e. the first 20 weeks). The algorithm was based on the expectation that women with known pre-existing diabetes are unlikely to receive GTT. As a modification to the algorithm, we further excluded women with only one diagnosis or who received diabetes treatment without a diabetes diagnosis.

**Figure S2. Flow chart illustrating the cohort creation process for each antipsychotic exposure group**

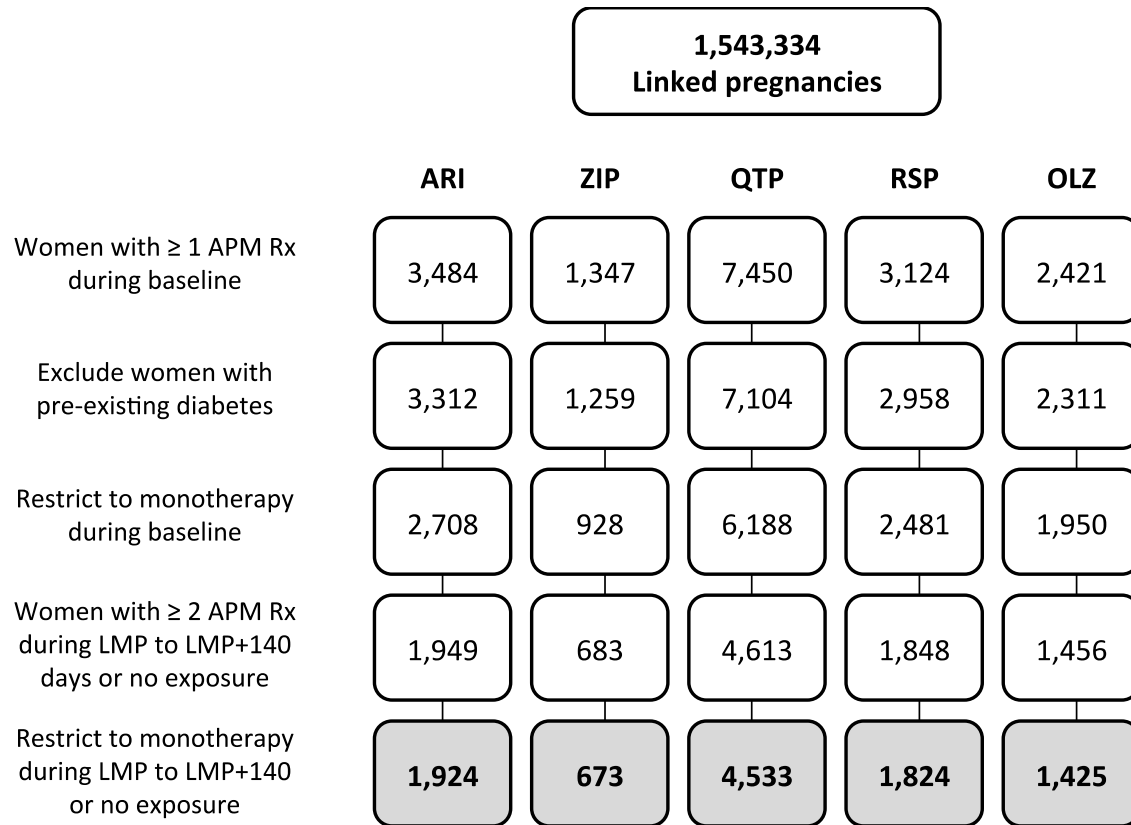

ARI: aripiprazole; QTP: quetiapine; RSP: risperidone; ZIP: ziprasidone; OLZ: olanzapine  
 APM: antipsychotics; Rx: prescription; LMP: last menstrual period
